# Supplementary material for: Dipyridamole decreases dialysis risk and improves survival in patients with pre-dialysis advanced chronic kidney disease
Source: PubMed Central journal article supplement (PMC5797055; doi:10.18632/oncotarget.19850), 2017-08-03
Supplement: oncotarget-09-5368-s001.pdf [file oncotarget-09-5368-s001.pdf]

## Dipyridamole decreases dialysis risk and improves survival in patients with pre-dialysis advanced chronic kidney disease

### SUPPLEMENTARY MATERIALS

**Supplementary Table 1: The formula of propensity scores in logistic model**

|                                                             | coefficient | Standard error | Odds ratio | 95% lower confidence interval | 95% upper confidence interval | P value |
|-------------------------------------------------------------|-------------|----------------|------------|-------------------------------|-------------------------------|---------|
| Age, y                                                      | -0.00305    | 0.0011         | 0.997      | 0.995                         | 0.999                         | 0.0056  |
| Male vs. female                                             | -0.039      | 0.0279         | 0.962      | 0.911                         | 1.016                         | 0.1621  |
| Comorbid condition with in the 3 preceding the index date   |             |                |            |                               |                               |         |
| Diabetes                                                    | 0.112       | 0.0336         | 1.119      | 1.047                         | 1.195                         | 0.0009  |
| MI                                                          | -0.1343     | 0.0325         | 0.874      | 0.82                          | 0.932                         | <.0001  |
| Stroke                                                      | 0.0421      | 0.0376         | 1.043      | 0.969                         | 1.123                         | 0.2629  |
| Cancer                                                      | 0.2743      | 0.0503         | 1.316      | 1.192                         | 1.452                         | <.0001  |
| CCI score                                                   | -0.0435     | 0.0074         | 0.957      | 0.944                         | 0.971                         | <.0001  |
| Nephrologist visits within the 3 y preceding the index date |             |                |            |                               |                               |         |
| 0                                                           | 1           | 1              | 1          | -                             | -                             |         |
| 1–6                                                         | 0.0635      | 0.0399         | 1.066      | 0.985                         | 1.152                         | 0.1115  |
| > 6                                                         | 0.0734      | 0.0361         | 1.076      | 1.003                         | 1.155                         | 0.0418  |
| Anti-hypertensive agents used                               |             |                |            |                               |                               |         |
| ACEI                                                        | -0.2652     | 0.0326         | 0.767      | 0.72                          | 0.818                         | <.0001  |
| ARB                                                         | 0.093       | 0.0287         | 1.097      | 1.037                         | 1.161                         | 0.0012  |
| Beta-blockers                                               | -0.0219     | 0.0326         | 0.978      | 0.918                         | 1.043                         | 0.5004  |
| Calcium channel blockers                                    | 0.0553      | 0.0283         | 1.057      | 1                             | 1.117                         | 0.0504  |
| Diuretics                                                   | -0.0239     | 0.0326         | 0.976      | 0.916                         | 1.041                         | 0.464   |
| Pentoxifylline                                              | 0.2839      | 0.0394         | 1.328      | 1.23                          | 1.435                         | <.0001  |
| Insulin                                                     | 0.2212      | 0.0368         | 1.248      | 1.161                         | 1.341                         | <.0001  |
| Statin                                                      | -0.0232     | 0.0378         | 0.977      | 0.907                         | 1.052                         | 0.5402  |
| Aspirin                                                     | 0.0184      | 0.0358         | 1.019      | 0.949                         | 1.093                         | 0.6077  |
| Acetaminophen                                               | 0.0147      | 0.0284         | 1.015      | 0.96                          | 1.073                         | 0.6043  |
| NSAIDs                                                      |             |                |            |                               |                               |         |
| COX-2 inhibitors                                            | -0.1039     | 0.0298         | 0.901      | 0.85                          | 0.956                         | 0.0005  |
| Non-COX-2 inhibitors                                        | -0.0428     | 0.0636         | 0.958      | 0.846                         | 1.085                         | 0.501   |
| Geographic location                                         |             |                |            |                               |                               |         |
| Northern                                                    | 1           | 1              | 1          | -                             | -                             |         |
| Middle                                                      | -0.274      | 0.0346         | 0.76       | 0.71                          | 0.814                         | <.0001  |
| Southern                                                    | 0.1503      | 0.0323         | 1.162      | 1.091                         | 1.238                         | <.0001  |
| Eastern or other islands                                    | 0.405       | 0.109          | 1.499      | 1.211                         | 1.856                         | 0.0002  |

ACEI = angiotensin converting enzyme inhibitor. ARB = angiotensin II receptor blocker. CCI = Charlson comorbidity index. COX-2 = cyclooxygenase -2. MI = myocardial infarction. NSAID = non-steroidal anti-inflammatory drug.

## Supplementary Table 2: Risks of long-term dialysis and death in pre-dialysis stage 5 CKD patients with dipyridamole exposure within 30 days and observation period beginning 30 days after the index date

|                           | Before Matching |                                   |                   |                      | After Matching |                                   |                      |
|---------------------------|-----------------|-----------------------------------|-------------------|----------------------|----------------|-----------------------------------|----------------------|
|                           | N of events     | Incidence rate (100 person-years) | Crude HR (95% CI) | Adjusted HR (95% CI) | N of events    | Incidence rate (100 person-years) | Adjusted HR (95% CI) |
| <b>Long-term dialysis</b> |                 |                                   |                   |                      |                |                                   |                      |
| Dipyridamole nonuser      | 19,622          | 79.94                             | 1.0 (reference)   | 1.0 (reference)      | 14,160         | 77.62                             | 1.0 (reference)      |
| Dipyridamole user         | 7,685           | 76.12                             | 0.97 (0.94–0.99)* | 0.99 (0.96–1.01)     | 7,511          | 76.60                             | 0.98 (0.96–1.01)     |
| < 140 DDD                 | 4,086           | 83.83                             | 1.06 (1.02–1.10)* | 1.10 (1.06–1.14)*    | 3,995          | 84.53                             | 1.10 (1.06–1.14)*    |
| ≥ 140 DDD                 | 3,599           | 68.93                             | 0.88 (0.85–0.91)* | 0.88 (0.85–0.92)*    | 3,516          | 69.22                             | 0.88 (0.85–0.91)*    |
| < 75 mg/day               | 3,908           | 84.98                             | 1.08 (1.04–1.11)* | 1.11 (1.07–1.15)*    | 3,819          | 85.75                             | 1.11 (1.07–1.15)*    |
| ≥ 75 mg/day               | 3,777           | 68.71                             | 0.87 (0.84–0.90)* | 0.88 (0.85–0.92)*    | 3,692          | 68.99                             | 0.88 (0.85–0.91)*    |
| <b>Death</b>              |                 |                                   |                   |                      |                |                                   |                      |
| Dipyridamole nonuser      | 5,327           | 21.70                             | 1.0 (reference)   | 1.0 (reference)      | 4,039          | 22.14                             | 1.0 (reference)      |
| Dipyridamole user         | 1,992           | 19.73                             | 0.91 (0.86–0.96)* | 0.89 (0.84–0.93)*    | 1,941          | 19.80                             | 0.89 (0.84–0.94)*    |
| < 140 DDD                 | 1,160           | 23.80                             | 1.10 (1.04–1.18)* | 1.04 (0.97–1.10)     | 1,128          | 23.87                             | 1.04 (0.97–1.11)     |
| ≥ 140 DDD                 | 832             | 15.93                             | 0.73 (0.68–0.78)* | 0.74 (0.69–0.79)*    | 813            | 16.01                             | 0.74 (0.69–0.80)*    |
| < 75 mg/day               | 1,101           | 23.94                             | 1.11 (1.04–1.19)* | 1.04 (0.97–1.11)     | 1,071          | 24.05                             | 1.04 (0.97–1.11)     |
| ≥ 75 mg/day               | 891             | 16.21                             | 0.74 (0.69–0.79)* | 0.75 (0.70–0.81)*    | 870            | 16.26                             | 0.76 (0.70–0.81)*    |

Abbreviations: CI, confidence interval; CKD, chronic kidney disease; DDD, defined daily doses; HR, hazard ratio

A multivariate analysis was adjusted for all of the variables listed in Table 1.

\* $P < 0.05$  compared with dipyridamole nonusers.

## Supplementary Table 3: Risks of long term dialysis and death in pre-dialysis stage 5 CKD patients with dipyridamole exposure within 60 days and observation period beginning 60 days after the index date

|                           | Before Matching |                                   |                   |                      | After Matching |                                   |                      |
|---------------------------|-----------------|-----------------------------------|-------------------|----------------------|----------------|-----------------------------------|----------------------|
|                           | N of events     | Incidence rate (100 person-years) | Crude HR (95% CI) | Adjusted HR (95% CI) | N of events    | Incidence rate (100 person-years) | Adjusted HR (95% CI) |
| <b>Long-term dialysis</b> |                 |                                   |                   |                      |                |                                   |                      |
| Dipyridamole nonuser      | 16,804          | 77.01                             | 1.0 (reference)   | 1.0 (reference)      | 12,199         | 75.69                             | 1.0 (reference)      |
| Dipyridamole user         | 6,614           | 72.82                             | 0.96 (0.94–0.99)* | 0.98 (0.95–1.01)     | 6,459          | 73.26                             | 0.97 (0.94–1.00)*    |
| < 140 DDD                 | 3,329           | 77.61                             | 1.01 (0.98–1.05)  | 1.06 (1.02–1.10)*    | 3,254          | 78.46                             | 1.05 (1.01–1.09)     |
| ≥ 140 DDD                 | 3,285           | 68.53                             | 0.91 (0.87–0.94)* | 0.91 (0.88–0.95)*    | 3,205          | 68.63                             | 0.89 (0.86–0.93)*    |
| < 75 mg/day               | 3,169           | 78.46                             | 1.03 (0.99–1.07)  | 1.07 (1.03–1.11)*    | 3,096          | 79.39                             | 1.06 (1.02–1.11)     |
| ≥ 75 mg/day               | 3,445           | 68.30                             | 0.90 (0.87–0.93)* | 0.91 (0.88–0.95)*    | 3,363          | 68.39                             | 0.89 (0.86–0.93)*    |
| <b>Death</b>              |                 |                                   |                   |                      |                |                                   |                      |
| Dipyridamole nonuser      | 4,679           | 21.44                             | 1.0 (reference)   | 1.0 (reference)      | 3,571          | 22.16                             | 1.0 (reference)      |
| Dipyridamole user         | 1,787           | 19.68                             | 0.92 (0.87–0.97)* | 0.90 (0.85–0.95)*    | 1,739          | 19.72                             | 0.89 (0.84–0.94)*    |
| < 140 DDD                 | 979             | 22.83                             | 1.07 (1.00–1.14)  | 0.99 (0.93–1.07)     | 948            | 22.86                             | 0.98 (0.91–1.05)     |
| ≥ 140 DDD                 | 808             | 16.86                             | 0.78 (0.73–0.84)* | 0.80 (0.75–0.87)*    | 791            | 16.94                             | 0.80 (0.74–0.86)*    |
| < 75 mg/day               | 926             | 22.93                             | 1.07 (1.00–1.15)* | 0.99 (0.92–1.07)     | 897            | 23.00                             | 0.98 (0.91–1.04)     |
| ≥ 75 mg/day               | 861             | 17.07                             | 0.79 (0.74–0.85)* | 0.82 (0.76–0.88)*    | 842            | 17.12                             | 0.81 (0.75–0.87)*    |

Abbreviations: CI, confidence interval; CKD, chronic kidney disease; DDD, defined daily doses; HR, hazard ratio

A multivariate analysis was adjusted for all of the variables listed in Table 1.

\* $P < 0.05$  compared with dipyridamole nonusers.

**Supplementary Table 4: Risks of long term dialysis and death in pre-dialysis stage 5 CKD patients with dipyridamole exposure within 120 days and observation period beginning 120 days after the index date**

|                           | Before Matching    |                                       |                      |                         | After Matching     |                                       |                         |
|---------------------------|--------------------|---------------------------------------|----------------------|-------------------------|--------------------|---------------------------------------|-------------------------|
|                           | <i>N</i> of events | Incidence rate<br>(100 person- years) | Crude HR<br>(95% CI) | Adjusted HR<br>(95% CI) | <i>N</i> of events | Incidence rate<br>(100 person- years) | Adjusted HR<br>(95% CI) |
| <b>Long-term dialysis</b> |                    |                                       |                      |                         |                    |                                       |                         |
| Dipyridamole nonuser      | 12,423             | 71.29                                 | 1.0 (reference)      | 1.0 (reference)         | 9,012              | 68.83                                 | 1.0 (reference)         |
| Dipyridamole user         | 4,990              | 67.01                                 | 0.95 (0.92–0.98)*    | 0.97 (0.94–1.00)        | 4,836              | 67.66                                 | 0.98 (0.95–1.01)        |
| < 140 DDD                 | 2,370              | 69.12                                 | 0.97 (0.93–1.01)     | 1.01 (0.97–1.06)        | 2,296              | 70.15                                 | 1.03 (0.98–1.08)        |
| ≥ 140 DDD                 | 2,620              | 65.21                                 | 0.93 (0.89–0.97)*    | 0.93 (0.89–0.97)*       | 2,540              | 65.56                                 | 0.94 (0.90–0.98)*       |
| < 75 mg/day               | 2,236              | 69.41                                 | 0.98 (0.93–1.02)     | 1.02 (0.97–1.06)        | 2,163              | 70.52                                 | 1.04 (0.99–1.09)        |
| ≥ 75 mg/day               | 2,754              | 65.18                                 | 0.92 (0.89–0.96)*    | 0.93 (0.89–0.97)*       | 2,673              | 65.52                                 | 0.94 (0.90–0.98)*       |
| <b>Death</b>              |                    |                                       |                      |                         |                    |                                       |                         |
| Dipyridamole nonuser      | 3,579              | 20.54                                 | 1.0 (reference)      | 1.0 (reference)         | 2,768              | 21.14                                 | 1.0 (reference)         |
| Dipyridamole user         | 1,389              | 18.65                                 | 0.90 (0.85–0.96)*    | 0.89 (0.84–0.95)*       | 1,343              | 18.79                                 | 0.88 (0.82–0.94)*       |
| < 140 DDD                 | 710                | 20.71                                 | 1.00 (0.93–1.09)     | 0.94 (0.86–1.02)        | 681                | 20.81                                 | 0.92 (0.84–1.00)*       |
| ≥ 140 DDD                 | 679                | 16.90                                 | 0.81 (0.75–0.88)*    | 0.85 (0.78–0.93)*       | 662                | 17.09                                 | 0.85 (0.78–0.92)*       |
| < 75 mg/day               | 666                | 20.67                                 | 1.00 (0.92–1.09)     | 0.93 (0.85–1.01)        | 638                | 20.80                                 | 0.91 (0.83–0.99)*       |
| ≥ 75 mg/day               | 723                | 17.11                                 | 0.83 (0.76–0.89)*    | 0.86 (0.80–0.94)*       | 705                | 17.28                                 | 0.86 (0.79–0.93)*       |

Abbreviations: CI, confidence interval; CKD, chronic kidney disease; DDD, defined daily doses; HR, hazard ratio

A multivariate analysis was adjusted for all of the variables listed in Table 1.

\**P* < 0.05 compared with dipyridamole nonusers.

**Supplementary Table 5: Risk of bleeding in patients with pre-dialysis stage 5 CKD receiving dipyridamole as compared with dipyridamole nonusers**

|                      | Before Matching   |                                       |                      |                         | After Matching    |                                       |                         |
|----------------------|-------------------|---------------------------------------|----------------------|-------------------------|-------------------|---------------------------------------|-------------------------|
|                      | <i>N</i> of event | Incidence rate<br>(100 person- years) | Crude HR<br>(95% CI) | Adjusted HR<br>(95% CI) | <i>N</i> of event | Incidence rate<br>(100 person- years) | Adjusted HR<br>(95% CI) |
| <b>Bleeding</b>      |                   |                                       |                      |                         |                   |                                       |                         |
| dipyridamole nonuser | 2,528             | 1.36                                  | 1.0 (reference)      | 1.0 (reference)         | 1,884             | 1.38                                  | 1.0 (reference)         |
| dipyridamole user    | 1,087             | 1.38                                  | 1.03 (0.96–1.11)     | 0.99 (0.92–1.06)        | 1,047             | 1.37                                  | 1.00 (0.92–1.08)        |

Abbreviations: CI, confidence interval; CKD, chronic kidney disease; HR, hazard ratio

A multivariate analysis was adjusted for all variables listed in Table 1.

\**P* < 0.05 compared with dipyridamole nonusers.
